# Supplementary material
Source: PubMed Central journal article supplement (PMC9098209)
Supplement: NIHMS1691560-supplement-Supplementary_Information__Rmarkdown.pdf [file NIHMS1691560-supplement-Supplementary_Information__Rmarkdown.pdf]

---

**Supplementary information**

---

**Detection of respiratory syncytial virus defective genomes in nasal secretions is associated with distinct clinical outcomes**

---

In the format provided by the authors and unedited

# Host transcriptome analysis of 13 hospitalized pediatric patients

Yan Sun

3/17/2020

## Step 1: Sleuth\_TxImport

```
library(tidyverse) # provides access to Hadley Wickham's collection of R packages for data science, whi

## -- Attaching packages ----- tidyverse 1.3.0 --
## v ggplot2 3.3.0    v purrr  0.3.3
## v tibble  2.1.3    v dplyr  0.8.5
## v tidyr   1.0.2    v stringr 1.4.0
## v readr   1.3.1    v forcats 0.5.0

## -- Conflicts ----- tidyverse_conflicts() --
## x dplyr::filter() masks stats::filter()
## x dplyr::lag()    masks stats::lag()

library(tximport) # package for getting Kallisto results into R
library(biomaRt) # provides access to a wealth of annotation info
targets <- read.table("studyDesign_h.txt", row.names=NULL, header = T, as.is = T)# read in your study d
path <- file.path(targets$sample, "abundance.h5")
# now check to make sure this path is correct by seeing if the files exist
all(file.exists(path))

## [1] TRUE

targets <- mutate(targets, path) # add paths to your study design (only necessary for Sleuth)
Hs.anno <- useMart(biomart="ENSEMBL_MART_ENSEMBL", dataset = "hsapiens_gene_ensembl") # select 'mart' f
Tx <- getBM(attributes=c('ensembl_transcript_id_version', # get gene symbols for each transcript ID
                        'external_gene_name'),
            mart = Hs.anno)
Tx <- as_tibble(Tx) # convert this annotation mapping file to a tibble (the tidyverse version of a data
Tx_i_gene <- tximport(path, #reading kallisto data into R
                    type = "kallisto",
                    tx2gene = Tx,
                    txOut = FALSE,
                    countsFromAbundance = "lengthScaledTPM")

## 1
## 2 3 4 5 6 7 8 9 10 11 12 13
## transcripts missing from tx2gene: 4823
## summarizing abundance
## summarizing counts
## summarizing length
## summarizing inferential replicates
```

```

myCPM <- as_tibble(Txi_gene$abundance, rownames = "geneSymbol") # these are you counts after adjusting
## Warning: `as_tibble.matrix()` requires a matrix with column names or a `.name_repair` argument. Using
## This warning is displayed once per session.
myCounts <- as_tibble(Txi_gene$counts, rownames = "geneSymbol") # these are your transcript per million

```

## Step 2: dataWrangling

```

library(RColorBrewer)
library(reshape2)

```

```

##
## Attaching package: 'reshape2'
## The following object is masked from 'package:tidyr':
##
## smiths

```

```

library(genefilter)

```

```

##
## Attaching package: 'genefilter'
## The following object is masked from 'package:readr':
##
## spec

```

```

library(edgeR)

```

```

## Loading required package: limma

```

```

library(matrixStats)

```

```

##
## Attaching package: 'matrixStats'
## The following objects are masked from 'package:genefilter':
##
## rowSds, rowVars
## The following object is masked from 'package:dplyr':
##
## count

```

```

groups1 <- targets$DVGgroup
groups1 <- factor(groups1)
groups2 <- targets$Severity
groups2 <- factor(groups2)
groups3 <- targets$DVG.Severity
groups3 <- factor(groups3)
sampleLabels <- targets$sample

```

```

myDGEList <- DGEList(Txi_gene$counts)
save(myDGEList, file = "myDGEList_all")
load(file = "myDGEList_all")
log2.cpm <- cpm(myDGEList, log=TRUE)

```

```

nsamples <- ncol(log2.cpm)
myColors <- brewer.pal(nsamples, "Paired")

## Warning in brewer.pal(nsamples, "Paired"): n too large, allowed maximum for palette Paired is 12
## Returning the palette you asked for with that many colors

log2.cpm.df <- as_tibble(log2.cpm)
colnames(log2.cpm.df) <- sampleLabels
log2.cpm.df.melt <- melt(log2.cpm.df)

## No id variables; using all as measure variables

ggplot(log2.cpm.df.melt, aes(x=variable, y=value, fill=variable)) +
  geom_violin(trim = FALSE, show.legend = FALSE) +
  stat_summary(fun.y = "median", geom = "point", shape = 124, size = 6, color = "black", show.legend = FALSE) +
  labs(y="log2 expression", x = "sample",
       title="Log2 Counts per Million (CPM)",
       subtitle="unfiltered, non-normalized",
       caption=paste0("produced on ", Sys.time())) +
  coord_flip()

```

```
## Warning: `fun.y` is deprecated. Use `fun` instead.
```

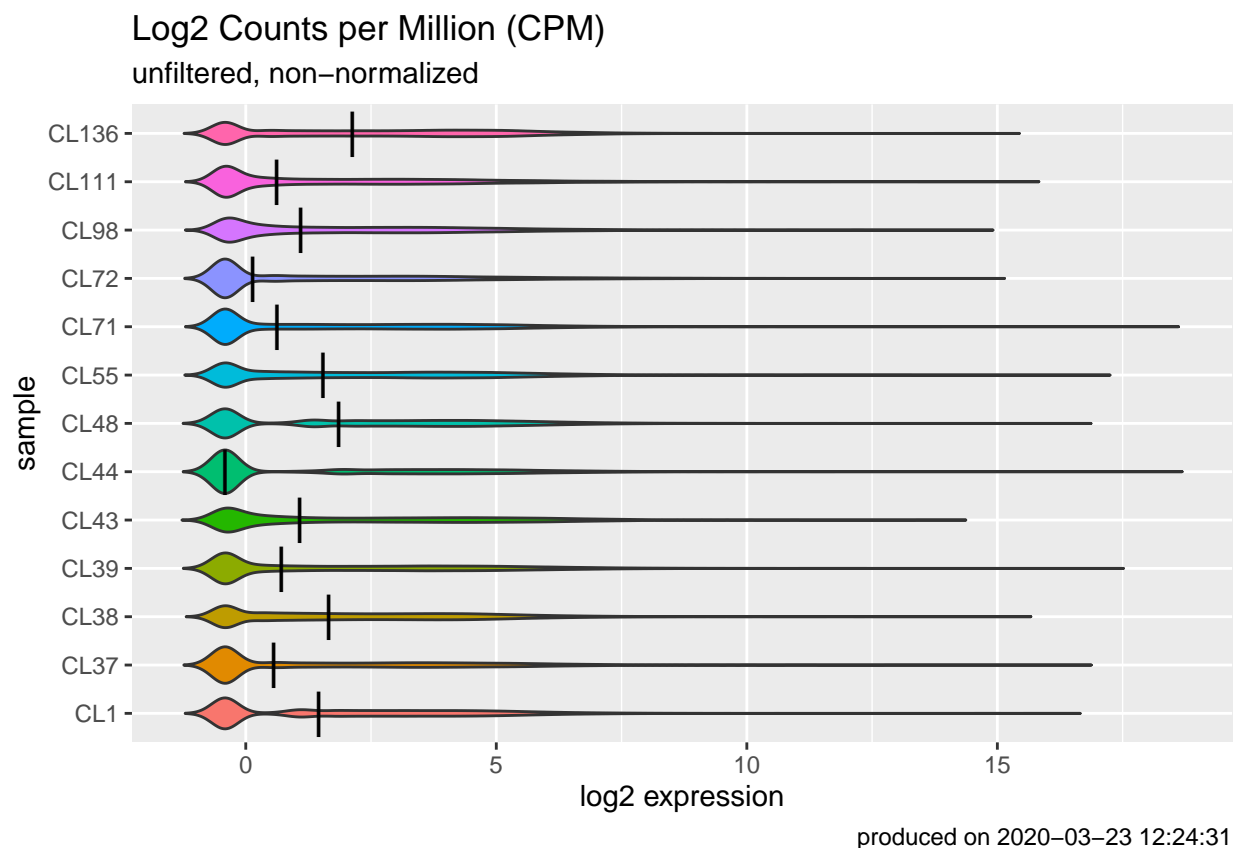

### Step3: filter the low expression genes

```

keepers <- rowSums(log2.cpm>1)>=4
myDGEList.filtered <- myDGEList[keepers,]
myDGEList.filtered.norm <- calcNormFactors(myDGEList.filtered, method = "TMM")

```

```
log2.cpm.filtered.norm <- cpm(myDGEList.filtered.norm, log=TRUE)
log2.cpm.filtered.norm.df <- as_tibble(log2.cpm.filtered.norm)
colnames(log2.cpm.filtered.norm.df) <- sampleLabels
log2.cpm.filtered.norm.df.melt <- melt(log2.cpm.filtered.norm.df)
```

```
## No id variables; using all as measure variables
```

```
ggplot(log2.cpm.filtered.norm.df.melt, aes(x=variable, y=value, fill=variable)) +
  geom_violin(trim = FALSE, show.legend = FALSE) +
  stat_summary(fun.y = "median", geom = "point", shape = 124, size = 6, color = "black", show.legend = FALSE) +
  labs(y="log2 expression", x = "sample",
       title="Log2 Counts per Million (CPM)",
       subtitle="filtered, TMM normalized",
       caption=paste0("produced on ", Sys.time())) +
  coord_flip()
```

```
## Warning: `fun.y` is deprecated. Use `fun` instead.
```

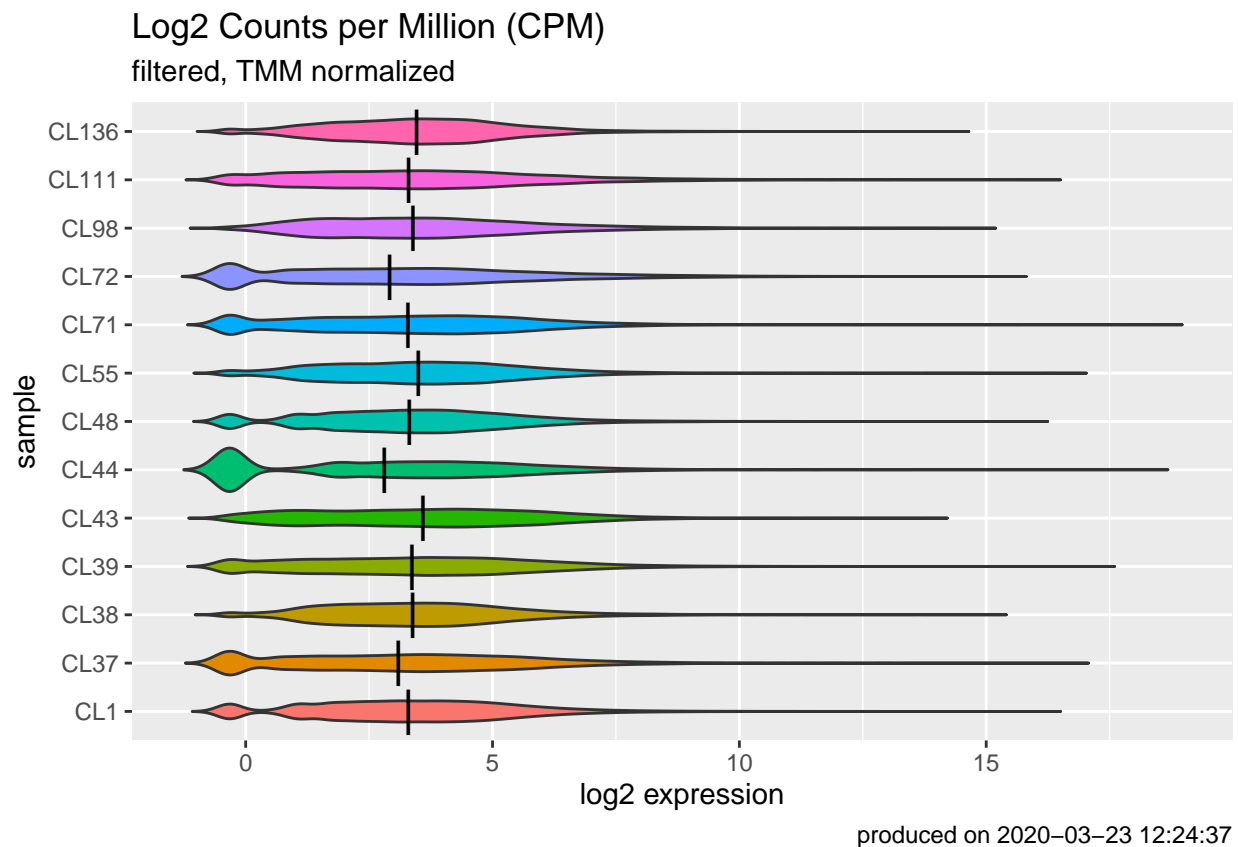

#### Step 4: multivariate

```
library(tidyverse)
library(reshape2)
library(DT)
library(gt)
library(plotly)
```

```
##
```

```

## Attaching package: 'plotly'

## The following object is masked from 'package:biomaRt':
##
##   select

## The following object is masked from 'package:ggplot2':
##
##   last_plot

## The following object is masked from 'package:stats':
##
##   filter

## The following object is masked from 'package:graphics':
##
##   layout

pca.res <- prcomp(t(log2.cpm.filtered.norm), scale.=F, retx=T)
pc.var<-pca.res$sdev^2
pc.per<-round(pc.var/sum(pc.var)*100, 1)

pca.res.df <- as_tibble(pca.res$x)
ggplot(pca.res.df, aes(x=PC1, y=PC2, color=groups1)) +
  geom_point(size=5) +
  theme(legend.position="right")

```

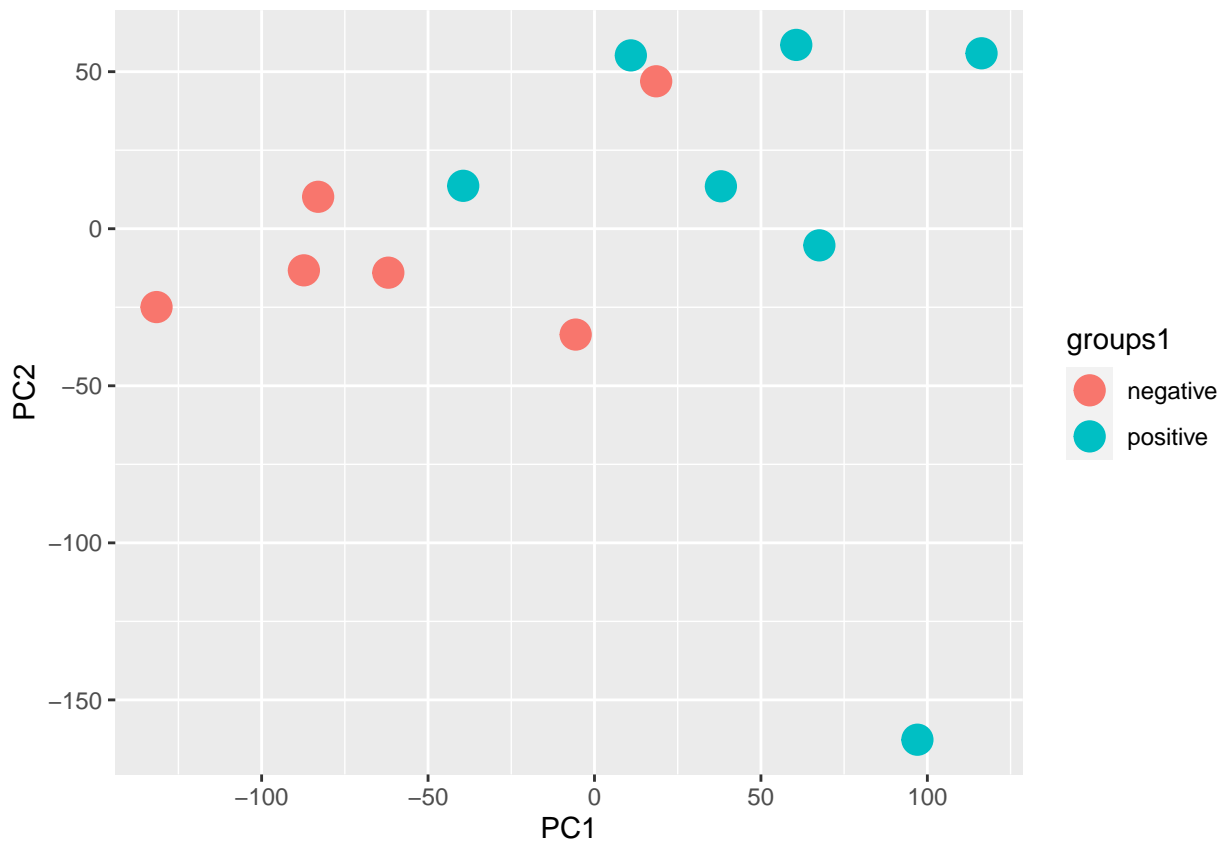

## Step 6: diffGenes

```
library(tidyverse)
library(limma) #powerful package for differential gene expression using linear modeling
library(edgeR) #another great package for differential gene expression analysis
library(gt)
library(DT) #creates interactive datatables
library(plotly)
library(statmod)

design <- model.matrix(~0 + groups1)
colnames(design) <- levels(groups1)
rownames(design) <- targets$sample
corfit <- duplicateCorrelation(myDGEList.filtered.norm$counts, design, block=targets$sample)
corfit$consensus

## [1] NaN

v.DEGList.filtered.norm <- voomWithQualityWeights(myDGEList.filtered.norm, design, plot = TRUE)
```

**voom: Mean–variance trend**

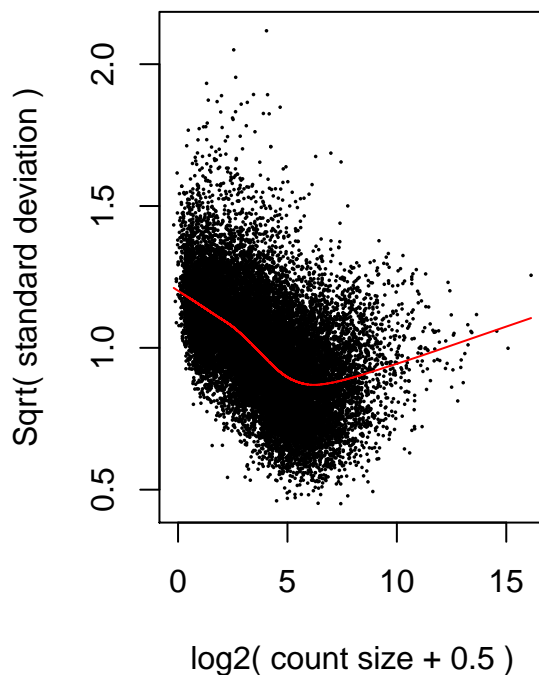

**Sample–specific weights**

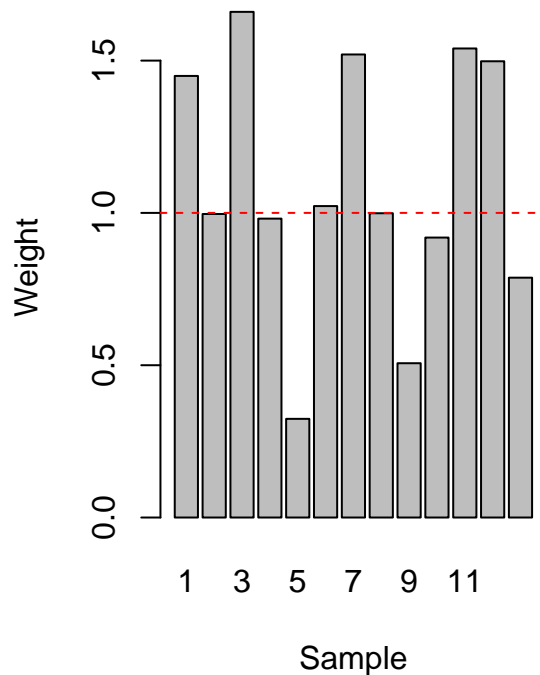

```
#v.DEGList.filtered.norm <- voom(myDGEList.filtered.norm, design, plot = FALSE)
fit <- lmFit(v.DEGList.filtered.norm, design)
#fit <- lmFit(v.DEGList.filtered.norm, design, block=targets$sample, correlation=corfit$consensus)
contrast.matrix <- makeContrasts(DVG = positive - negative,
                                levels=design)

fits <- contrasts.fit(fit, contrast.matrix)
ebFit <- eBayes(fits)
myTopHits <- topTable(ebFit, adjust = "BH", coef=1, number=40000, sort.by="logFC")
```

```

myTopHits <- as_tibble(myTopHits, rownames = "geneSymbol")

ggplot(myTopHits, aes(y=-log10(adj.P.Val), x=logFC, text = paste("Symbol:", geneSymbol))) +
  geom_point(size=2) +
  ylim(-0.5,12) +
  geom_hline(yintercept = -log10(0.01), linetype="longdash", colour="grey", size=1) +
  geom_vline(xintercept = 1, linetype="longdash", colour="#BE684D", size=1) +
  geom_vline(xintercept = -1, linetype="longdash", colour="#2C467A", size=1) +
  labs(title="Volcano plot",
       subtitle = "DEGs for cbDVG+ vs cbDVG-",
       caption=paste0("produced on ", Sys.time()))

```

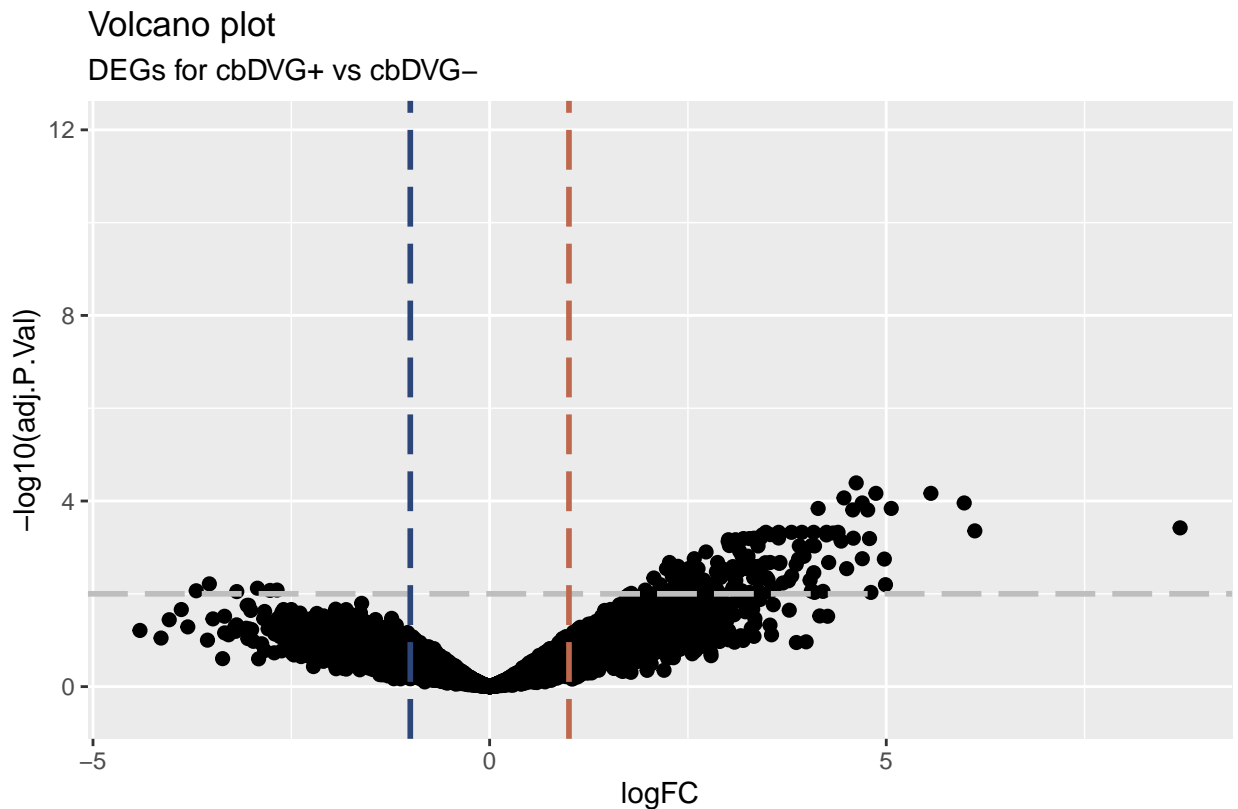

```

results <- decideTests(ebFit, method="global", adjust.method="BH", p.value=0.01, lfc=1)
summary(results)

```

```

##          DVG
## Down      6
## NotSig 20676
## Up       145

```

```

colnames(v.DEGList.filtered.norm$E) <- sampleLabels
diffGenes <- v.DEGList.filtered.norm$E[results[,1] !=0,]

```

## Step 7: modules

```

library(gplots) #the heatmap2 function in this package is a primary tool for making heatmaps

```



```
##
## Attaching package: 'gplots'

## The following object is masked from 'package:stats':
##
##      lowess

library(RColorBrewer) #need colors to make heatmaps
library(limma) #we only use limma in this script for the 'avearrays' function
myheatcolors2 <- colorRampPalette(colors=c("yellow","white","blue"))(100)
clustRows <- hclust(as.dist(1-cor(t(diffGenes), method="pearson")), method="complete") #cluster rows by
clustColumns <- hclust(as.dist(1-cor(diffGenes, method="spearman")), method="complete")
module.assign <- cutree(clustRows, k=3)
module.color <- rainbow(length(unique(module.assign)), start=0.1, end=0.9)
module.color <- module.color[as.vector(module.assign)]
heatmap.2(diffGenes,
  Rowv=as.dendrogram(clustRows),
  RowSideColors=module.color,
  col=myheatcolors2, scale='row',
  density.info="none", trace="none",
  cexRow=1, cexCol=1, margins=c(10,25))
```

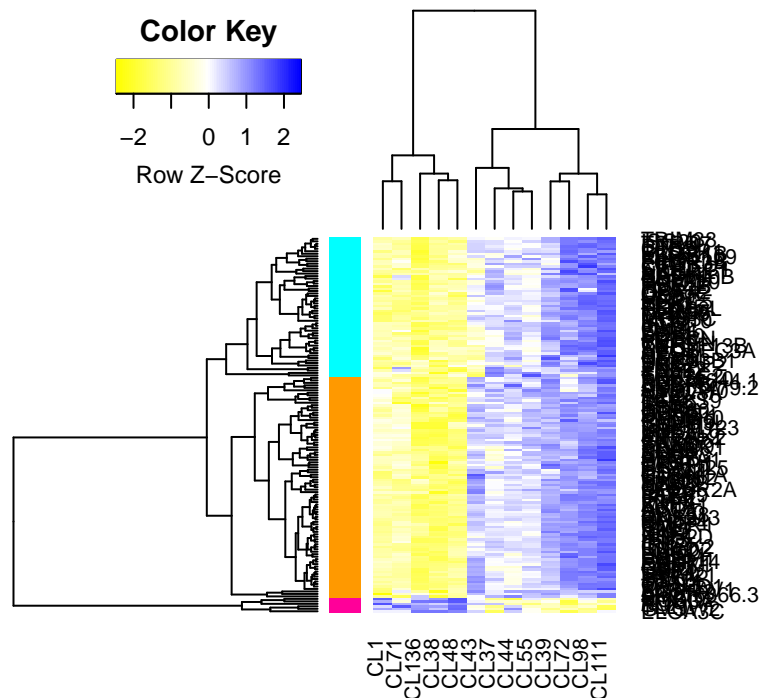

Note that the `echo = FALSE` parameter was added to the code chunk to prevent printing of the R code that generated the plot.
