# Supplementary material
Source: PubMed Central journal article supplement (PMC9098209)

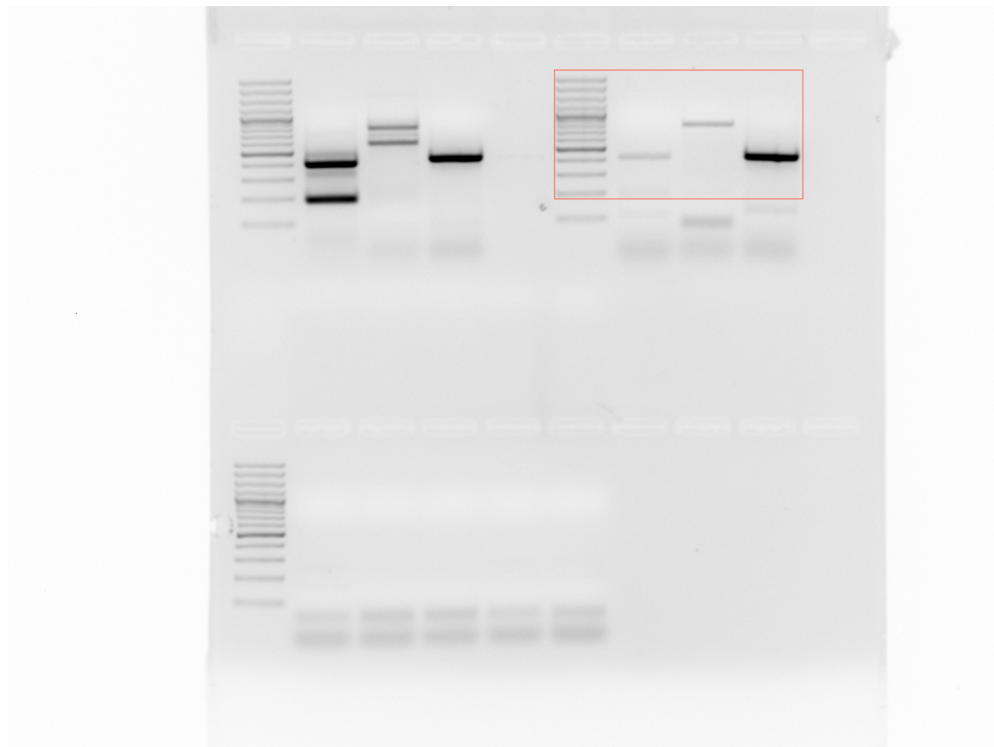

Supplement: NIHMS1691560-supplement-Source_Data_Extended_Data_Fig__2_Unprocessed_PCR_gels_.pdf [file NIHMS1691560-supplement-Source_Data_Extended_Data_Fig__2_Unprocessed_PCR_gels_.pdf]
